# Supplementary material for: The epidemiology, radiology and biological characteristics of interval breast cancers in population mammography screening
Source: PubMed Central journal article supplement (PMC5460204; doi:10.1038/s41523-017-0014-x), 2017-04-13

## Appendix 1: Flow-diagram of the literature search and study inclusion process

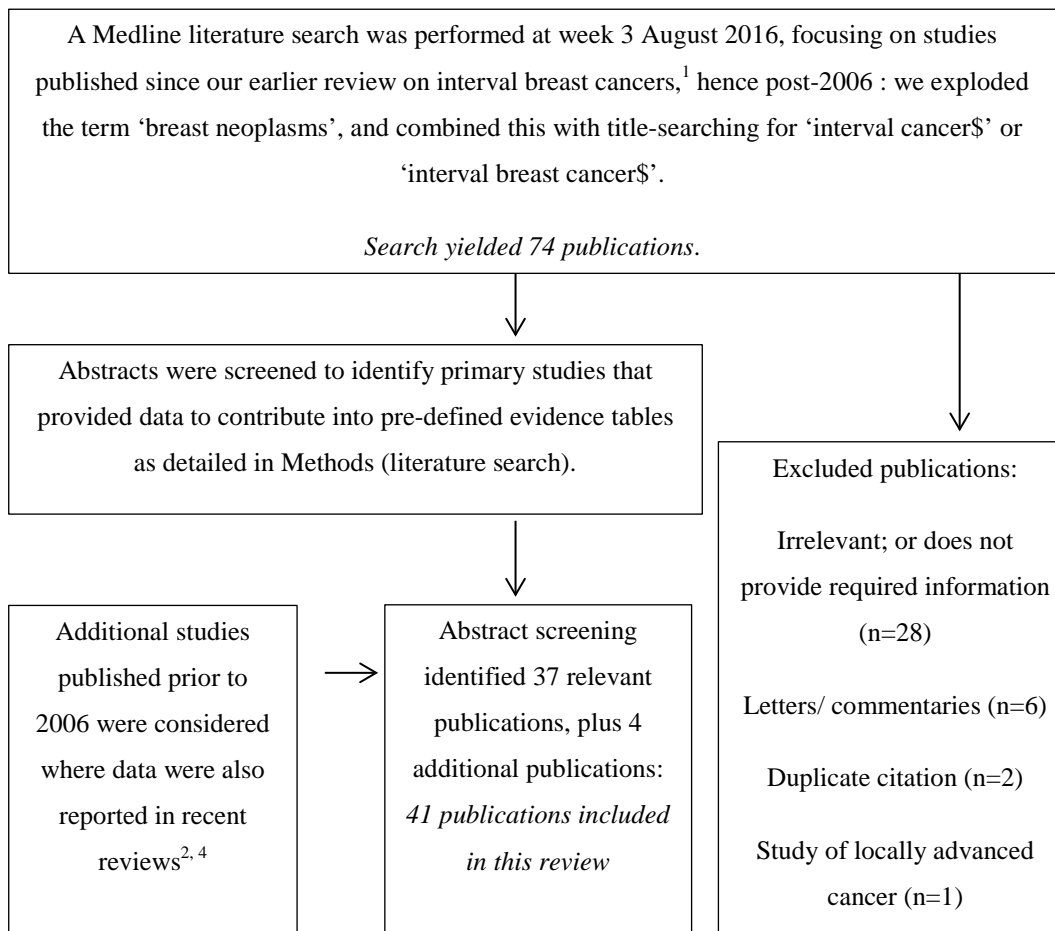

Supplement: 41523_2017_14_MOESM1_ESM.pdf [file 41523_2017_14_MOESM1_ESM.pdf]
